# Supplementary material for: The effect of music on the perception of outdoor urban environment
Source: PeerJ. 2020 Sep 1;8:e9770. doi: 10.7717/peerj.9770 (PMC7473044; doi:10.7717/peerj.9770)
Supplement: Supplemental Information 1 [file peerj-08-9770-s001.xls]

## Sheet: 1
gender	condition	env1_1_coherence	env1_2_legibility	env1_3_complexity	env1_4_mystery	env1_5_openness	env1_6_energy	env1_7_abandoned	env1_8_pleasant	env1_9_interesting	env2_1_coherence	env2_2_legibility	env2_3_complexity	env2_4_mystery	env2_5_openness	env2_6_energy	env2_7_abandoned	env2_8_pleasant	env2_9_interesting	env3_1_coherence	env3_2_legibility	env3_3_complexity	env3_4_mystery	env3_5_openness	env3_6_energy	env3_7_abandoned	env3_8_pleasant	env3_9_interesting	env4_1_coherence	env4_2_legibility	env4_3_complexity	env4_4_mystery	env4_5_openness	env4_6_energy	env4_7_abandoned	env4_8_pleasant	env4_9_interesting	env5_1_coherence	env5_2_legibility	env5_3_complexity	env5_4_mystery	env5_5_openness	env5_6_energy	env5_7_abandoned	env5_8_pleasant	env5_9_interesting	Liking music	Music distrubed
female	music1	3	5	5	1	3	1	4	1	1	5	5	3	2	4	2	1	2	2	5	5	2	5	4	5	1	5	5	5	5	1	4	5	2	3	3	4	5	5	1	5	4	5	1	5	5	3	2
female	control	2	4	4	2	2	1	1	2	2	4	4	4	3	2	2	1	2	4	5	2	3	5	5	5	2	4	4	5	2	4	5	5	5	4	4	5	5	4	5	5	4	5	4	5	5
female	music2	3	5	3	1	2	3	3	3	1	3	5	4	3	3	3	1	3	3	5	5	2	5	4	4	4	5	5	5	4	2	3	4	3	4	4	3	5	4	2	5	3	5	5	5	5	2	3
female	music1	3	3	3	2	2	2	2	3	2	4	5	4	4	4	3	2	3	3	5	3	3	4	4	4	2	4	4	4	4	3	3	4	3	3	3	3	4	4	4	4	3	4	3	5	5	4	4
female	control	5	5	2	2	2	1	3	2	3	5	5	4	4	5	3	1	4	4	5	5	2	4	4	3	2	4	5	5	5	3	4	5	2	4	4	5	5	5	3	5	3	3	2	5	5
female	music2	3	5	4	2	3	2	3	2	2	3	5	4	3	4	3	2	2	3	5	4	2	4	3	4	5	4	4	5	3	2	3	2	4	5	4	4	5	2	1	3	1	2	5	2	3	4	3
male	music2	5	2	3	2	2	4	4	2	4	1	2	5	4	2	3	1	3	3	5	2	3	5	3	4	4	4	5	3	2	3	4	3	3	4	4	4	5	3	3	5	2	4	2	4	4	5	1
male	music1	4	5	3	2	3	2	2	2	2	2	5	4	4	3	3	3	4	4	5	5	3	3	4	3	4	4	4	4	4	3	3	5	3	4	3	5	4	5	3	4	2	3	3	4	4	4	2
male	control	2	3	1	1	1	1	5	1	1	3	4	3	2	2	2	2	3	3	5	3	4	2	4	5	4	5	4	3	2	2	1	4	1	5	2	1	5	4	5	4	4	5	2	4	5
male	music2	4	5	3	2	2	2	3	2	2	3	5	4	3	4	3	1	4	4	5	3	3	5	4	5	5	5	5	5	3	2	3	4	4	5	4	3	4	4	3	4	3	4	5	5	5	5	1
male	music1	3	4	3	1	3	1	5	1	1	3	5	4	2	5	1	1	2	2	4	5	3	4	5	3	2	5	4	2	4	1	3	5	1	5	3	3	5	4	3	3	3	2	4	4	3	5	1
male	music2	3	5	2	2	2	3	2	3	2	1	5	5	1	2	2	1	4	2	4	5	2	5	3	5	5	5	5	5	4	2	4	5	3	5	4	2	5	5	2	5	4	5	3	5	5	5	1
female	music1	2	4	3	1	2	2	4	1	1	4	5	5	2	4	3	1	2	2	5	5	5	4	2	4	2	4	4	5	5	4	4	5	4	4	4	3	5	5	5	5	5	5	4	5	5	5	1
male	control	1	5	4	1	2	1	4	2	2	1	4	5	2	5	2	1	2	2	5	5	1	5	3	4	3	4	4	2	4	2	2	5	4	3	3	3	5	5	1	5	2	5	2	5	5
female	music2	3	5	3	4	2	1	3	4	4	1	5	5	1	4	1	1	3	3	5	5	1	5	5	2	4	5	4	5	3	2	4	5	4	5	5	5	5	3	1	5	1	4	5	5	5	5	1
female	music2	1	5	5	1	1	1	5	1	2	2	5	5	4	4	2	1	3	2	5	5	1	5	5	4	2	5	4	5	5	1	4	5	4	5	5	3	5	4	1	5	1	5	1	5	5	4	1
male	music1	2	2	4	2	2	2	4	3	2	1	4	5	4	4	3	1	3	4	5	3	2	4	4	4	3	5	5	4	3	2	2	5	2	4	2	3	5	2	3	5	2	4	3	4	4	4	2
female	control	3	5	3	2	3	2	3	2	1	4	5	5	3	4	2	1	3	2	5	5	2	3	5	5	4	4	4	3	5	2	3	3	5	5	3	4	5	5	2	3	5	3	5	4	5
female	music2	1	3	4	3	2	4	5	2	3	4	3	5	5	2	4	1	4	4	5	5	1	5	4	5	1	5	5	5	5	1	5	5	3	3	2	3	5	5	5	5	5	5	1	4	5	3	1
female	control	1	4	2	1	4	1	5	2	1	4	5	3	4	4	2	1	3	2	5	4	3	4	4	4	4	4	3	4	4	1	1	4	1	5	2	1	5	5	3	4	4	4	5	3	3
male	control	3	4	5	1	2	1	4	2	1	3	5	4	4	5	4	1	3	4	5	3	1	3	4	5	4	5	5	5	2	2	2	5	2	3	2	3	5	4	2	4	3	5	2	4	5
female	music2	2	4	3	2	4	2	3	2	2	4	5	5	3	4	2	1	3	3	4	4	1	4	5	3	4	3	3	5	3	2	4	5	3	5	3	4	4	3	2	4	4	4	4	3	4	3	1
male	control	3	4	4	1	2	2	3	2	1	2	4	5	1	4	2	2	1	3	5	2	5	5	4	5	4	4	4	5	3	4	3	4	4	5	3	3	5	3	4	5	4	5	4	5	5
male	music2	2	5	3	2	3	2	4	2	2	3	5	5	4	5	3	1	4	4	4	5	3	4	5	4	4	4	4	3	5	1	1	5	3	5	5	2	4	5	4	5	2	5	4	5	5	5	1
female	music1	3	2	2	2	2	1	4	1	1	3	4	4	2	3	2	4	2	1	5	1	2	2	3	3	2	3	3	4	1	1	2	3	3	2	3	2	5	2	2	2	2	5	2	4	4	4	1
male	control	3	5	1	1	3	1	1	1	1	4	5	3	4	5	3	2	3	3	4	5	1	5	5	5	5	5	5	3	5	1	4	5	4	5	4	4	5	4	2	5	5	5	5	5	5
female	music1	3	5	5	2	5	2	3	3	2	4	5	5	3	4	3	1	3	3	5	2	4	2	5	3	2	3	3	3	1	1	1	5	2	5	1	1	5	2	3	2	5	5	3	5	5	2	4
female	control	4	5	2	1	1	1	1	1	1	2	5	5	2	5	2	1	3	3	5	2	2	4	5	4	2	4	4	5	2	1	2	5	2	4	4	4	5	2	3	4	4	5	3	5	5
male	music1	4	5	4	2	5	2	2	3	2	3	5	5	2	5	2	2	3	2	5	5	3	3	5	4	4	4	3	5	5	3	3	5	4	4	4	4	5	5	3	5	5	5	2	5	5	4	3
female	music2	3	4	4	3	3	3	4	4	3	4	3	3	3	5	2	4	4	3	4	1	4	4	3	5	3	4	4	4	4	2	3	3	4	4	4	3	5	5	5	5	5	5	5	5	5	5	1
female	music2	3	5	3	2	2	1	4	2	2	4	5	3	3	5	2	2	2	3	2	4	2	1	2	1	5	2	2	4	5	3	2	4	4	3	4	4	3	5	3	4	5	4	3	4	4	4	1
female	control	1	1	2	1	1	1	3	1	2	2	3	5	2	2	4	3	2	2	1	2	4	1	2	1	3	3	2	5	1	2	3	5	1	5	1	1	5	4	2	5	3	4	1	5	4
male	music2	1	4	4	1	1	1	4	1	1	3	5	4	4	4	3	3	3	4	4	5	5	4	5	5	4	5	5	5	4	4	4	4	5	5	4	3	5	5	5	5	4	5	2	5	5	4	1
male	control	3	3	2	1	2	1	3	1	1	2	4	4	2	5	1	2	2	3	3	2	4	3	4	1	5	3	2	5	2	2	2	5	1	5	4	2	5	2	2	3	3	2	3	4	4
male	control	2	5	3	1	3	1	5	1	1	4	5	4	5	5	4	1	4	4	3	5	3	3	3	1	1	2	2	5	5	2	5	5	3	5	5	4	5	5	2	5	5	3	4	5	5
male	music1	3	4	3	3	3	2	4	3	2	4	5	5	5	4	4	1	4	5	4	5	4	5	4	3	4	3	2	5	5	3	3	4	3	4	5	3	5	5	4	5	4	5	3	5	4	5	2
female	music1	4	1	3	1	3	2	5	2	2	4	5	4	3	3	3	3	4	4	4	2	3	4	4	3	5	3	4	2	2	2	4	3	5	4	4	4	3	4	2	5	5	5	2	4	5	4	2
male	music1	3	5	4	4	4	3	3	4	2	5	5	5	4	5	3	1	4	5	3	5	4	2	5	4	3	3	4	3	3	2	2	5	2	5	3	2	3	3	2	3	4	3	4	4	3	3	1
male	music2	2	5	4	1	2	1	2	1	1	5	5	5	5	3	2	1	2	3	3	5	4	1	3	1	3	1	1	5	5	2	2	3	4	3	3	2	5	5	2	4	2	5	2	4	5	5	5
female	control	2	5	5	2	2	3	4	4	2	3	5	5	4	5	3	1	5	4	3	5	5	2	2	3	4	3	2	5	5	2	2	5	3	4	3	2	5	5	2	2	5	3	2	5	4
female	music2	2	3	4	2	2	2	3	2	2	4	4	4	4	3	4	2	4	4	2	4	4	4	4	3	3	3	3	2	3	3	2	4	3	4	4	3	4	4	2	3	4	5	3	5	4	4	2
female	music1	4	3	4	1	2	1	5	3	2	4	5	4	2	3	2	2	3	3	2	3	5	2	2	2	4	3	2	3	3	2	3	5	3	4	3	3	5	5	3	5	2	4	4	5	5	3	2
male	music2	5	5	3	1	3	2	1	3	2	5	5	4	2	5	2	1	3	4	5	5	2	3	4	3	4	4	3	5	5	1	1	5	1	5	3	1	5	5	3	1	3	4	2	4	4	5	1
female	control	1	4	3	1	2	1	3	1	1	4	5	5	5	5	2	2	4	5	5	3	3	5	5	2	3	5	5	3	2	2	2	5	1	4	2	2	5	2	2	5	4	1	2	5	5
male	music2	2	3	5	1	2	2	4	1	1	2	5	5	5	5	5	1	3	4	5	5	3	3	5	4	3	5	4	5	2	2	2	5	5	3	5	3	5	3	4	4	4	5	3	5	4	2	1
female	music2	2	5	4	1	4	1	5	1	1	4	5	2	5	5	3	2	3	4	5	3	3	5	5	5	3	5	5	5	2	2	1	4	2	5	2	2	4	2	3	2	2	3	3	2	2	3	1
male	music1	2	1	2	3	1	3	4	2	2	4	3	5	4	3	3	1	4	4	5	2	2	5	4	5	2	4	4	4	2	2	2	4	2	5	3	2	4	3	3	4	2	4	3	5	3	3	1
female	control	3	2	1	1	1	1	5	1	1	2	4	4	2	3	2	3	2	2	5	3	2	4	4	5	2	5	4	4	2	1	1	3	2	5	2	2	4	4	2	2	2	2	4	3	2
female	music2	1	2	3	1	1	2	5	1	1	1	5	5	5	4	3	1	3	4	5	4	2	5	5	5	5	5	4	4	3	1	2	4	3	5	3	2	5	5	2	5	2	5	4	5	5	5	1
female	control	2	2	2	1	1	1	4	1	1	1	5	5	2	4	2	1	2	3	5	2	2	1	2	4	5	3	4	5	1	1	1	5	2	4	2	1	5	3	1	1	1	5	5	5	4
female	music2	3	4	2	1	5	1	2	3	1	1	5	5	3	5	2	1	2	3	5	1	1	3	2	4	5	5	3	5	1	1	2	4	3	4	4	2	5	4	1	5	2	4	5	5	5	4	1
female	music1	2	4	5	2	4	3	2	3	2	2	4	5	5	5	3	1	4	5	5	3	2	5	3	4	3	4	4	5	2	2	5	3	4	4	4	3	5	2	2	2	2	1	4	3	2	4	2
male	music2	3	2	5	2	2	1	2	1	1	1	5	5	2	5	1	1	1	2	5	4	5	1	3	3	4	5	5	5	5	5	2	5	4	5	4	3	5	5	3	1	5	3	3	2	2	2	1
female	control	4	3	5	1	2	1	3	1	1	3	4	5	2	4	1	2	2	2	3	4	4	1	2	2	3	2	2	5	5	5	3	5	2	2	3	3	5	5	3	4	5	4	3	4	4
male	control	4	4	4	3	2	2	1	2	2	2	3	5	3	2	3	2	1	2	4	4	2	3	4	3	4	3	3	2	3	1	1	5	2	5	2	1	3	5	2	1	4	5	5	2	3
female	music2	5	4	3	3	2	2	1	3	3	5	5	5	1	2	1	4	1	2	2	5	5	1	2	1	5	1	2	4	4	3	3	4	1	4	2	1	5	3	2	5	2	3	1	5	5	3	3
female	control	1	2	5	1	2	1	3	2	1	3	5	5	3	5	2	1	3	3	3	2	3	2	3	2	4	2	2	5	2	2	2	4	4	5	3	2	4	3	2	2	5	3	3	3	2
male	music1	1	4	2	1	2	1	1	2	1	3	5	3	2	5	2	1	2	2	3	4	3	3	4	2	4	3	2	4	4	2	2	4	1	4	3	2	4	3	5	4	2	3	3	3	4	4	2
male	control	4	2	2	2	2	2	4	2	2	2	5	5	2	3	2	2	3	2	4	5	4	3	4	4	3	4	4	3	4	2	2	4	3	4	3	2	4	2	2	3	2	3	5	2	2
female	control	1	4	5	1	2	1	3	2	2	2	4	4	3	2	3	1	3	3	4	4	2	4	5	5	3	5	5	2	4	2	2	5	2	4	3	2	4	4	4	3	3	3	3	4	4
female	music1	2	4	4	1	2	1	3	1	1	1	5	5	1	3	1	1	1	1	3	5	3	1	3	2	4	4	3	5	5	1	2	5	1	3	4	2	5	5	1	3	5	2	4	5	4	4	1
female	music1	2	5	4	1	1	2	3	1	2	2	5	4	2	2	1	1	1	2	4	5	4	2	5	3	3	3	3	2	3	4	2	2	2	3	1	2	4	4	5	4	3	4	4	4	3	3	2
female	music2	2	3	4	1	2	1	1	1	1	1	5	5	1	5	1	1	1	1	3	4	5	2	5	1	3	3	2	4	3	5	1	5	1	5	2	2	5	5	5	3	5	3	3	3	3	1	4
female	music1	1	5	4	1	3	1	1	1	1	1	5	5	3	4	1	4	2	3	3	5	4	3	3	3	1	3	4	3	5	4	3	5	3	3	4	3	5	5	5	5	5	5	1	5	5	5	1
female	control	2	5	4	1	4	1	1	2	2	3	5	5	2	4	1	1	2	2	2	5	5	2	4	3	3	2	2	2	4	4	3	4	2	2	2	2	2	4	4	3	2	3	4	4	4
female	control	3	5	4	1	4	1	3	2	2	5	5	3	2	3	3	1	2	4	2	3	4	3	4	2	4	3	4	4	3	3	2	4	3	5	4	4	3	2	4	5	4	3	3	4	5
female	music2	4	4	4	2	2	2	4	3	2	3	4	5	2	3	2	4	3	2	2	2	4	1	3	2	4	2	2	4	1	3	1	3	2	5	2	2	5	4	3	2	3	2	4	4	4	2	5
female	control	1	5	5	1	1	1	5	1	1	2	5	5	2	4	2	1	1	2	5	5	3	3	4	3	2	4	4	4	4	1	2	5	2	5	3	1	5	2	1	1	1	2	5	3	2
male	control	2	2	4	1	3	1	1	2	1	4	4	5	3	5	2	1	3	2	4	4	2	1	2	3	3	3	2	5	2	1	1	5	2	4	2	1	5	5	2	2	3	4	2	4	4
female	music1	2	3	4	2	2	2	2	3	1	5	5	5	1	4	2	1	1	2	5	5	3	2	3	5	3	3	4	5	5	3	3	5	4	4	4	5	5	5	4	4	5	5	4	5	5	3	2
female	control	1	5	5	1	4	2	2	2	2	4	5	5	1	5	1	1	3	4	2	5	5	2	5	1	5	3	2	3	5	2	2	5	2	5	2	3	5	5	2	5	2	5	4	5	5
female	music1	3	5	4	4	2	2	3	2	2	3	5	5	2	3	2	1	2	2	4	5	5	4	4	2	2	3	3	4	5	3	2	5	3	4	3	2	5	5	4	5	3	5	4	5	5	4	3
female	control	4	2	3	2	5	5	4	2	3	2	4	5	3	5	2	3	2	1	2	2	4	1	2	2	5	2	1	4	3	4	3	4	2	4	2	2	5	2	3	5	4	5	4	5	5
female	control	2	5	4	1	2	1	5	2	1	1	5	5	2	4	1	1	2	2	2	5	4	3	3	2	3	3	2	4	5	3	1	2	1	3	2	1	5	5	5	5	2	4	3	5	5
female	music2	1	5	5	2	4	2	1	1	2	1	5	5	3	3	4	1	1	2	2	4	5	4	4	2	4	2	3	4	4	2	3	5	4	5	3	3	5	4	3	2	5	4	5	3	2
female	music1	4	4	2	3	4	3	2	3	2	4	4	4	1	5	2	1	2	2	4	5	4	3	3	2	2	3	3	4	4	3	3	5	2	3	3	2	5	3	5	4	4	5	2	5	5	5	1
female	music2	2	3	2	1	2	1	2	1	1	3	5	5	3	3	2	1	2	4	4	4	5	3	3	4	4	4	4	4	3	3	3	5	3	5	4	4	5	2	4	5	3	5	5	5	5	5	1
male	control	3	2	3	2	1	1	1	1	2	3	3	4	3	2	3	2	3	4	5	3	4	3	3	4	3	4	4	2	3	3	1	3	2	4	2	2	5	2	2	3	4	4	2	2	3
female	music2	3	4	4	2	3	2	4	3	1	2	4	5	4	4	2	1	3	3	5	5	4	3	4	2	2	3	3	4	4	2	2	3	2	4	2	2	5	5	3	4	5	3	3	4	3	2	1
female	music1	3	5	2	1	2	3	4	1	1	1	5	5	1	4	3	2	1	1	5	5	3	2	4	3	1	4	4	4	5	2	1	5	1	3	2	2	5	5	3	2	2	3	4	3	3	1	5
male	music1	4	5	2	2	2	1	2	2	1	1	5	5	3	5	1	1	1	1	5	5	2	2	5	1	5	2	2	2	5	2	1	5	1	4	3	1	5	5	2	5	1	5	2	5	5	4	1
male	music2	3	5	5	4	2	1	2	3	4	3	5	5	5	4	1	1	4	5	5	5	5	4	5	1	4	4	4	4	5	2	3	5	1	4	5	4	4	4	3	3	5	1	3	4	3	5	1
female	music1	2	5	5	2	1	2	1	2	2	3	4	5	3	2	2	1	2	2	4	4	5	3	3	4	4	3	4	3	3	2	1	5	1	5	2	2	5	3	4	3	4	4	4	5	5	4	2
female	control	3	5	3	2	2	2	1	3	2	5	5	5	5	5	5	1	5	5	5	5	5	5	5	5	4	5	5	4	4	4	2	5	2	4	3	2	5	5	5	5	5	4	2	5	3
female	music2	3	5	4	2	2	1	4	2	2	2	5	5	3	4	2	1	3	3	3	4	5	4	4	3	2	3	3	4	4	3	3	4	3	2	4	3	5	4	5	4	5	4	3	4	4	4	1
female	music1	2	4	2	1	1	1	2	1	1	2	4	4	2	2	2	2	1	2	5	4	5	4	5	4	4	4	4	4	3	3	2	5	2	4	2	3	5	4	3	5	5	4	2	4	4	4	1
female	music2	2	5	4	1	4	1	2	2	2	2	5	5	1	4	1	1	2	2	4	5	3	2	3	3	4	3	2	5	5	2	3	3	3	4	4	2	4	4	3	3	4	3	3	4	3	4	1
male	music2	3	3	2	2	2	2	4	2	2	2	4	4	3	3	3	1	2	3	3	1	2	2	4	3	4	3	3	3	2	1	1	4	1	5	2	1	4	2	2	2	2	2	3	2	2	2	1
male	music2	2	5	4	2	3	2	2	3	2	2	5	4	2	3	3	2	2	2	2	4	4	3	4	2	3	3	3	4	5	5	4	4	4	4	3	4	5	5	4	3	4	4	2	4	4	5	2
male	control	3	3	3	1	5	1	1	2	2	4	5	5	3	5	3	1	3	4	4	4	3	1	4	1	4	3	3	5	4	2	1	5	1	5	3	1	5	4	3	1	3	1	5	2	1
male	control	1	3	2	3	2	2	2	1	1	3	3	5	3	2	2	2	2	2	1	3	4	1	1	1	2	1	1	2	2	3	3	3	2	2	3	3	4	4	2	2	3	3	2	2	2
male	music1	3	4	5	1	1	2	2	2	1	2	5	4	4	2	2	1	3	4	3	4	5	3	3	4	2	4	3	5	4	3	3	5	3	5	4	4	5	4	3	4	3	4	4	4	4	4	1
female	music1	3	3	4	3	2	3	3	3	1	2	3	5	2	4	3	1	1	3	3	5	4	1	3	3	3	2	2	3	3	3	3	4	3	4	1	1	5	1	4	1	3	1	5	2	1	3	2
male	music2	3	3	3	1	2	2	3	2	2	2	5	2	2	1	2	3	2	1	2	5	5	2	2	2	1	3	3	2	5	4	2	3	3	4	2	3	4	5	4	2	5	3	4	5	4	5	1
